# Supplementary material for: Joint Modelling of Confounding Factors and Prominent Genetic Regulators Provides Increased Accuracy in Genetical Genomics Studies
Source: PubMed Central journal article supplement (PMC3252274; doi:10.1371/journal.pcbi.1002330), 2012-01-05
Supplement: pcbi.1002330.s006.pdf [file pcbi.1002330.s006.pdf]

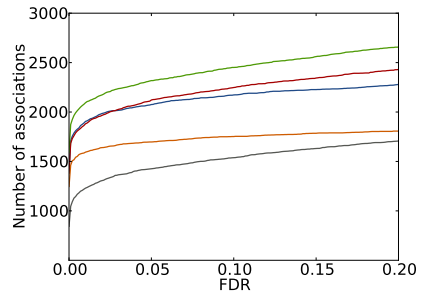

(a) Cis associations

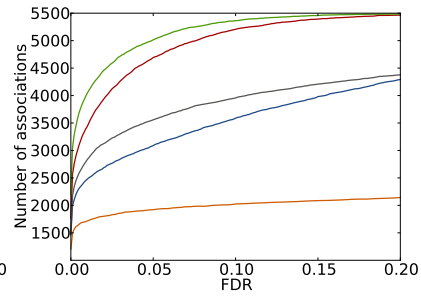

(b) Trans associations

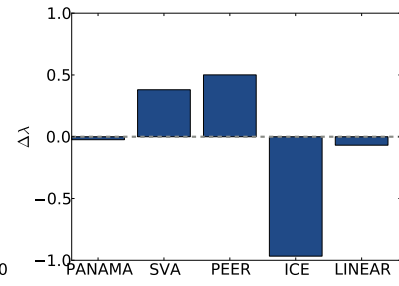

(c) Inflation factors
