# Supplementary material for: Joint Modelling of Confounding Factors and Prominent Genetic Regulators Provides Increased Accuracy in Genetical Genomics Studies
Source: PubMed Central journal article supplement (PMC3252274; doi:10.1371/journal.pcbi.1002330), 2012-01-05
Supplement: pcbi.1002330.s010.pdf [file pcbi.1002330.s010.pdf]

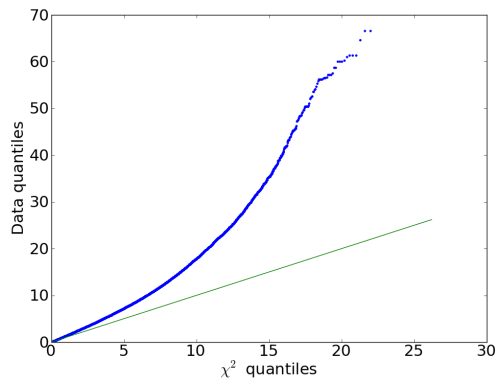

(a) Linear model

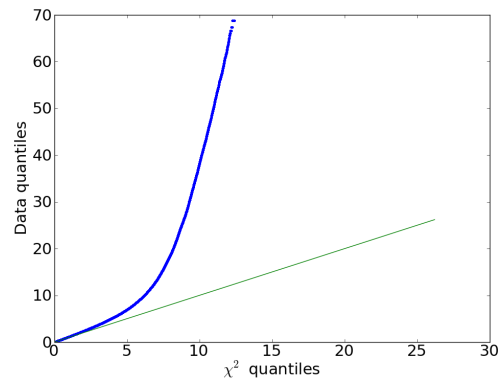

(b) Ideal model

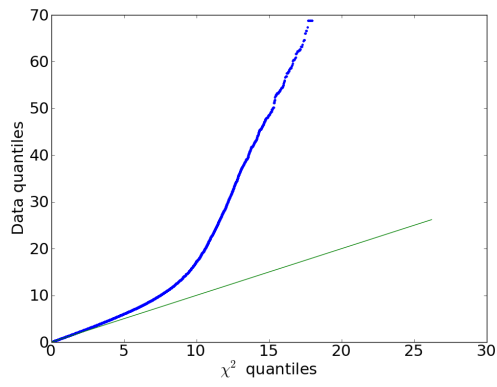

(c) SVA

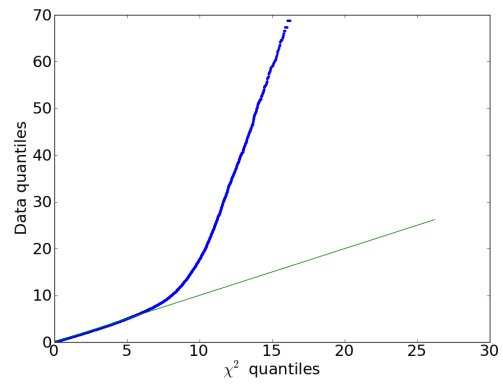

(d) ICE

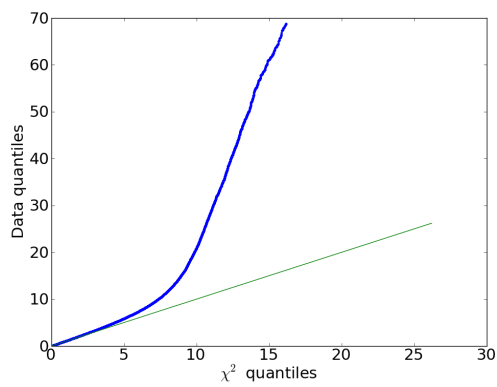

(e) PANAMA

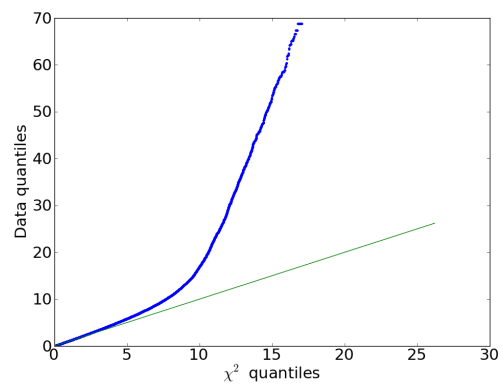

(f) PEER
