# Supplementary material for: Joint Modelling of Confounding Factors and Prominent Genetic Regulators Provides Increased Accuracy in Genetical Genomics Studies
Source: PubMed Central journal article supplement (PMC3252274; doi:10.1371/journal.pcbi.1002330), 2012-01-05
Supplement: pcbi.1002330.s012.pdf [file pcbi.1002330.s012.pdf]

| TF NAME | PANAMA       | LINEAR       | SVA          | ICE          | PEER         |
|---------|--------------|--------------|--------------|--------------|--------------|
| YLR228C | 0.013        | <b>0.026</b> | 0.000        | 0.000        | 0.013        |
| YOR372C | 0.011        | <b>0.044</b> | 0.000        | 0.000        | 0.011        |
| YMR042W | <b>0.044</b> | <b>0.044</b> | 0.022        | 0.000        | 0.022        |
| YIR023W | <b>0.014</b> | 0.005        | 0.005        | 0.005        | <b>0.014</b> |
| YHR124W | 0.036        | <b>0.059</b> | 0.019        | 0.019        | 0.031        |
| YOL028C | 0.000        | <b>0.201</b> | 0.000        | 0.000        | 0.000        |
| YOR172W | <b>0.133</b> | 0.000        | 0.000        | 0.000        | 0.000        |
| YNL103W | <b>0.022</b> | 0.008        | 0.008        | 0.008        | <b>0.022</b> |
| YDR213W | <b>0.010</b> | <b>0.010</b> | <b>0.010</b> | <b>0.010</b> | <b>0.010</b> |
| YHR206W | 0.000        | <b>0.902</b> | 0.000        | 0.000        | 0.000        |
| YDR034C | <b>0.020</b> | 0.000        | 0.000        | 0.000        | 0.000        |
| YMR280C | <b>0.031</b> | <b>0.031</b> | <b>0.031</b> | <b>0.031</b> | <b>0.031</b> |
| YML007W | 0.020        | <b>0.043</b> | 0.011        | 0.008        | 0.015        |
| YDR451C | 0.019        | <b>0.028</b> | 0.009        | 0.005        | 0.019        |
| YLR223C | 0.033        | <b>0.055</b> | 0.000        | 0.022        | 0.033        |
| YGL209W | <b>0.023</b> | 0.000        | 0.000        | 0.000        | 0.000        |
| YOR363C | 0.071        | <b>0.137</b> | 0.000        | 0.000        | 0.024        |
| YLR131C | 0.071        | <b>0.138</b> | 0.000        | 0.000        | 0.071        |
| YBR297W | 0.059        | 0.059        | <b>0.087</b> | 0.030        | 0.059        |
| YDL170W | 0.042        | <b>0.096</b> | 0.000        | 0.000        | 0.042        |
| YKL020C | <b>0.095</b> | <b>0.095</b> | 0.000        | 0.000        | <b>0.095</b> |
| YLR014C | 0.000        | <b>0.033</b> | 0.000        | 0.000        | 0.000        |
| YOR028C | <b>0.046</b> | 0.028        | 0.035        | 0.028        | <b>0.046</b> |
| YKL043W | <b>0.057</b> | 0.019        | 0.019        | 0.019        | 0.019        |
| YCR106W | <b>0.037</b> | 0.028        | 0.009        | 0.000        | 0.019        |
| YOR077W | 0.022        | <b>0.222</b> | 0.011        | 0.011        | 0.011        |
| YDR259C | <b>0.091</b> | <b>0.091</b> | 0.047        | 0.069        | 0.047        |
| YGL013C | <b>0.018</b> | 0.012        | 0.012        | 0.012        | <b>0.018</b> |
| YGL252C | <b>0.024</b> | <b>0.024</b> | 0.000        | 0.000        | <b>0.024</b> |
| YMR070W | <b>0.045</b> | 0.023        | <b>0.045</b> | <b>0.045</b> | <b>0.045</b> |
| YNL204C | <b>0.046</b> | 0.013        | 0.013        | 0.000        | 0.013        |
| YFL021W | 0.054        | <b>0.105</b> | 0.027        | 0.027        | 0.054        |
| YHR178W | <b>0.061</b> | 0.000        | 0.000        | 0.000        | 0.000        |
| YML027W | <b>0.031</b> | 0.009        | 0.013        | 0.013        | 0.018        |
| YGR288W | <b>0.016</b> | 0.000        | 0.000        | 0.000        | 0.000        |
| YJR060W | <b>0.060</b> | <b>0.060</b> | <b>0.060</b> | 0.045        | <b>0.060</b> |
| YKR099W | <b>0.020</b> | 0.000        | 0.000        | 0.000        | <b>0.020</b> |
| YBR066C | <b>0.022</b> | <b>0.022</b> | <b>0.022</b> | 0.007        | 0.014        |
| YML076C | <b>0.048</b> | 0.024        | 0.010        | 0.005        | 0.039        |
| YIR018W | 0.042        | <b>0.082</b> | 0.042        | 0.042        | 0.042        |
| YER028C | <b>0.016</b> | 0.012        | 0.012        | 0.012        | 0.012        |
| YER045C | <b>0.051</b> | 0.026        | 0.039        | 0.026        | 0.039        |
| YOL067C | 0.079        | <b>0.246</b> | 0.027        | 0.040        | 0.079        |
| YMR312W | 0.075        | <b>0.143</b> | 0.000        | 0.019        | 0.075        |
| YBL008W | <b>0.040</b> | 0.012        | 0.028        | 0.004        | 0.028        |
| YGR044C | <b>0.053</b> | 0.000        | 0.000        | 0.027        | <b>0.053</b> |
| YGL071W | 0.039        | <b>0.067</b> | 0.000        | 0.000        | 0.029        |
| YJL103C | <b>0.024</b> | <b>0.024</b> | 0.000        | 0.000        | 0.000        |
| YOL116W | <b>0.023</b> | 0.000        | 0.000        | 0.000        | 0.000        |
| YBL103C | 0.037        | <b>0.060</b> | 0.000        | 0.000        | 0.037        |

| TF NAME | PANAMA       | LINEAR       | SVA          | ICE          | PEER         |
|---------|--------------|--------------|--------------|--------------|--------------|
| YBR182C | <b>0.013</b> | 0.009        | 0.009        | 0.004        | <b>0.013</b> |
| YNL255C | <b>0.075</b> | 0.000        | 0.038        | 0.038        | 0.038        |
| YDL020C | <b>0.108</b> | 0.056        | 0.056        | 0.056        | 0.056        |
| YOR113W | <b>0.070</b> | 0.036        | <b>0.070</b> | 0.036        | <b>0.070</b> |
| YPL230W | <b>0.051</b> | 0.000        | 0.000        | 0.000        | 0.026        |
| YPR008W | <b>0.016</b> | 0.000        | 0.000        | 0.000        | <b>0.016</b> |
| YIL036W | <b>0.038</b> | 0.033        | 0.017        | 0.017        | <b>0.038</b> |
| YMR172W | <b>0.065</b> | 0.049        | 0.033        | 0.033        | <b>0.065</b> |
| YKL005C | <b>0.043</b> | <b>0.043</b> | <b>0.043</b> | 0.000        | <b>0.043</b> |
| YMR043W | <b>0.018</b> | 0.008        | 0.008        | 0.005        | 0.005        |
| YBR215W | 0.070        | <b>0.147</b> | 0.000        | 0.043        | 0.070        |
| YMR164C | <b>0.011</b> | 0.000        | 0.000        | 0.000        | 0.000        |
| YNL309W | 0.074        | <b>0.108</b> | 0.006        | 0.011        | 0.074        |
| YDR480W | <b>0.010</b> | 0.000        | <b>0.010</b> | 0.000        | <b>0.010</b> |
| YDR423C | <b>0.084</b> | 0.043        | 0.043        | 0.064        | <b>0.084</b> |
| YML051W | <b>0.017</b> | 0.010        | 0.010        | 0.009        | 0.013        |
| YFR034C | 0.061        | <b>0.091</b> | 0.062        | 0.031        | 0.061        |
| YKL185W | <b>0.052</b> | 0.021        | 0.032        | 0.016        | 0.032        |
| YDR253C | <b>0.040</b> | 0.020        | 0.025        | 0.010        | 0.025        |
| YOR380W | 0.030        | <b>0.073</b> | 0.000        | 0.015        | 0.030        |
| YHR006W | 0.011        | <b>0.033</b> | 0.011        | 0.000        | 0.011        |
| YER109C | <b>0.069</b> | 0.018        | 0.035        | 0.009        | 0.018        |
| YNL167C | <b>0.037</b> | 0.022        | <b>0.037</b> | 0.029        | <b>0.037</b> |
| YOL089C | 0.072        | <b>0.281</b> | 0.000        | 0.012        | 0.072        |
| YGL166W | <b>0.066</b> | <b>0.066</b> | <b>0.066</b> | 0.000        | <b>0.066</b> |
| YPL133C | 0.009        | <b>0.018</b> | 0.000        | 0.000        | 0.000        |
| YJL110C | <b>0.117</b> | 0.000        | 0.000        | 0.000        | 0.000        |
| YHR056C | <b>0.021</b> | 0.014        | 0.014        | 0.014        | <b>0.021</b> |
| YKL038W | 0.000        | <b>0.087</b> | 0.000        | 0.000        | 0.000        |
| YDR207C | 0.010        | <b>0.031</b> | 0.000        | 0.000        | 0.000        |
| YGL073W | <b>0.037</b> | 0.015        | 0.021        | 0.012        | 0.028        |
| YKL109W | 0.052        | <b>0.057</b> | 0.031        | 0.022        | 0.044        |
| YIR033W | 0.000        | <b>0.010</b> | 0.000        | 0.000        | 0.000        |
| YGL096W | <b>0.027</b> | 0.004        | 0.016        | 0.020        | <b>0.027</b> |
| YLR256W | <b>0.007</b> | 0.000        | 0.000        | 0.000        | 0.000        |
| YJR147W | <b>0.118</b> | <b>0.118</b> | <b>0.118</b> | <b>0.118</b> | <b>0.118</b> |
| YMR021C | 0.000        | <b>0.048</b> | 0.000        | 0.000        | 0.000        |
| YCL055W | <b>0.016</b> | <b>0.016</b> | <b>0.016</b> | <b>0.016</b> | <b>0.016</b> |
| YPL075W | <b>0.020</b> | <b>0.020</b> | <b>0.020</b> | <b>0.020</b> | <b>0.020</b> |
| YDR421W | 0.032        | <b>0.262</b> | 0.032        | 0.016        | 0.016        |
| YER161C | <b>0.024</b> | 0.004        | 0.016        | 0.004        | 0.012        |
| YBR083W | <b>0.031</b> | 0.016        | 0.016        | 0.016        | <b>0.031</b> |
| YIR017C | 0.054        | <b>0.071</b> | 0.018        | 0.018        | 0.054        |
| YFL031W | <b>0.059</b> | 0.030        | 0.045        | 0.045        | 0.045        |
| YLR098C | <b>0.012</b> | <b>0.012</b> | <b>0.012</b> | 0.000        | <b>0.012</b> |
| YNL216W | <b>0.013</b> | 0.000        | <b>0.013</b> | 0.000        | <b>0.013</b> |
| YDR216W | 0.011        | <b>0.044</b> | 0.000        | 0.011        | 0.011        |
| YDR096W | <b>0.100</b> | 0.000        | 0.000        | 0.000        | <b>0.100</b> |
| YER169W | <b>0.118</b> | 0.000        | <b>0.118</b> | <b>0.118</b> | <b>0.118</b> |

| TF NAME | PANAMA       | LINEAR       | SVA          | ICE          | PEER         |
|---------|--------------|--------------|--------------|--------------|--------------|
| YOR162C | <b>0.017</b> | 0.000        | 0.000        | 0.000        | 0.000        |
| YDR463W | <b>0.007</b> | 0.000        | 0.000        | 0.000        | <b>0.007</b> |
| YGL162W | <b>0.023</b> | 0.008        | 0.008        | 0.000        | <b>0.023</b> |
| YIL154C | <b>0.009</b> | 0.000        | <b>0.009</b> | 0.000        | <b>0.009</b> |
| YKL112W | <b>0.022</b> | 0.018        | 0.018        | 0.013        | <b>0.022</b> |
| YKL062W | <b>0.034</b> | <b>0.034</b> | <b>0.034</b> | <b>0.034</b> | <b>0.034</b> |
| YIL101C | <b>0.024</b> | 0.000        | 0.012        | 0.000        | <b>0.024</b> |
| YDR123C | 0.012        | 0.000        | <b>0.024</b> | 0.000        | 0.012        |
| YGL035C | <b>0.052</b> | 0.038        | 0.031        | 0.024        | 0.031        |
| YPR199C | 0.057        | <b>0.084</b> | 0.017        | 0.017        | 0.057        |
| YPL089C | 0.000        | <b>0.053</b> | 0.000        | 0.000        | 0.000        |
| YHR200W | 0.070        | <b>0.286</b> | 0.000        | 0.000        | 0.033        |
| YIL131C | <b>0.013</b> | 0.000        | 0.000        | 0.000        | <b>0.013</b> |
| YDL056W | 0.018        | 0.004        | <b>0.024</b> | 0.015        | 0.018        |
| YDL106C | 0.005        | 0.000        | <b>0.009</b> | 0.000        | 0.000        |
| YPL139C | <b>0.045</b> | <b>0.045</b> | 0.034        | 0.034        | <b>0.045</b> |
| YOL108C | 0.088        | <b>0.196</b> | 0.000        | 0.018        | 0.088        |
| YLR266C | <b>0.009</b> | <b>0.009</b> | <b>0.009</b> | <b>0.009</b> | <b>0.009</b> |
| YLR375W | 0.012        | <b>0.035</b> | 0.000        | 0.000        | 0.012        |
| YDR081C | <b>0.017</b> | 0.011        | 0.011        | 0.011        | <b>0.017</b> |
| YJR127C | 0.022        | <b>0.077</b> | 0.022        | 0.015        | 0.022        |
| YJL089W | <b>0.037</b> | 0.025        | 0.025        | 0.012        | <b>0.037</b> |
| YOR038C | <b>0.032</b> | 0.005        | 0.016        | 0.005        | <b>0.032</b> |
| YNL199C | <b>0.012</b> | 0.006        | 0.010        | 0.006        | <b>0.012</b> |
| YMR037C | <b>0.026</b> | 0.013        | 0.022        | 0.013        | 0.020        |
| YNL027W | 0.000        | <b>0.040</b> | 0.000        | 0.000        | 0.000        |
| YBL021C | <b>0.038</b> | <b>0.038</b> | <b>0.038</b> | <b>0.038</b> | <b>0.038</b> |
| YDR277C | <b>0.027</b> | 0.013        | <b>0.027</b> | 0.020        | <b>0.027</b> |
| YLR176C | <b>0.044</b> | 0.022        | 0.000        | 0.022        | <b>0.044</b> |
| YBR049C | <b>0.043</b> | 0.022        | 0.000        | 0.022        | 0.011        |
| YBL005W | 0.017        | <b>0.026</b> | 0.017        | 0.009        | 0.017        |
