# Supplementary material for: Joint Modelling of Confounding Factors and Prominent Genetic Regulators Provides Increased Accuracy in Genetical Genomics Studies
Source: PubMed Central journal article supplement (PMC3252274; doi:10.1371/journal.pcbi.1002330), 2012-01-05
Supplement: pcbi.1002330.s013.pdf [file pcbi.1002330.s013.pdf]

|               | Low rank | LMM | Preserves genetic signal |
|---------------|----------|-----|--------------------------|
| SVA           | ✓        |     | ✓(partially)             |
| PEER          | ✓        |     | ✓(partially)             |
| ICE           |          | ✓   |                          |
| LMM-EH        |          | ✓   |                          |
| <b>PANAMA</b> | ✓        | ✓   | ✓                        |
| LINEAR        |          |     | ✓                        |
